# Supplementary material for: The Neuroprotective Role of Origanum syriacum L. and Lavandula dentata L. Essential Oils through Their Effects on AMPA Receptors
Source: Hindawi journal article supplement (doi:10.1155/2019/5640173), 2019-03-11
Supplement: f1 [file 5640173.f1.pdf]

## Supplemental Information

### **The Neuroprotective Role of *Origanum syriacum L.* and *Lavandula dentata L.* Essential Oils through their Effects on AMPA Receptors**

Mohammad Qneibi<sup>1,\*</sup>, Nidal Jaradat<sup>2</sup>, Mohammed Hawash<sup>2</sup>, Abdel Naser Zaid<sup>2</sup>, Abdel- Razzak Natsheh<sup>3</sup>, Remah Yousef<sup>1</sup>, Qais Abuhasan<sup>1</sup>

## SUPPLEMENTAL FIGURES AND LEGENDS

**Figure S1.** GC/MS chromatogram of *L. dentata* essential oil

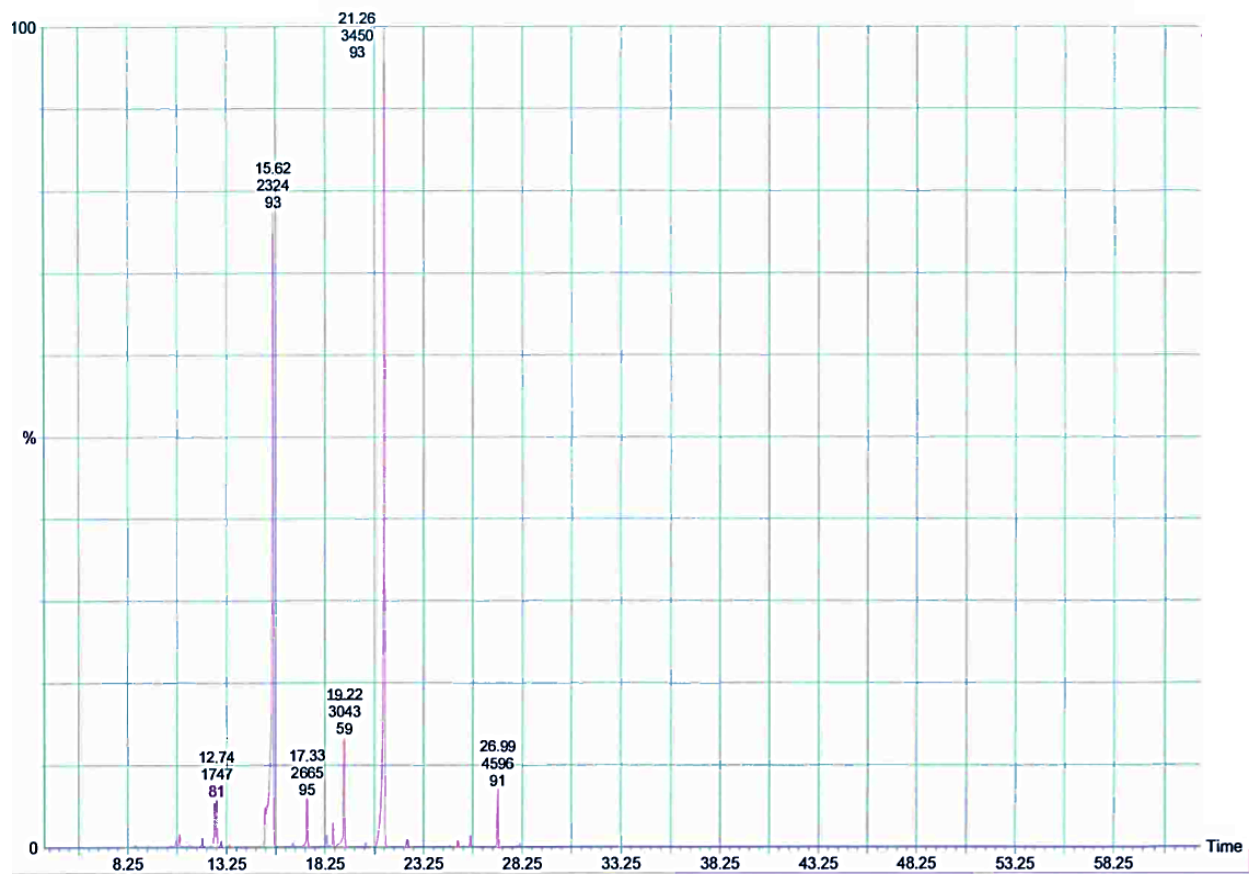

Figure S2. GC/MS chromatogram of *O. syriacum* essential oil

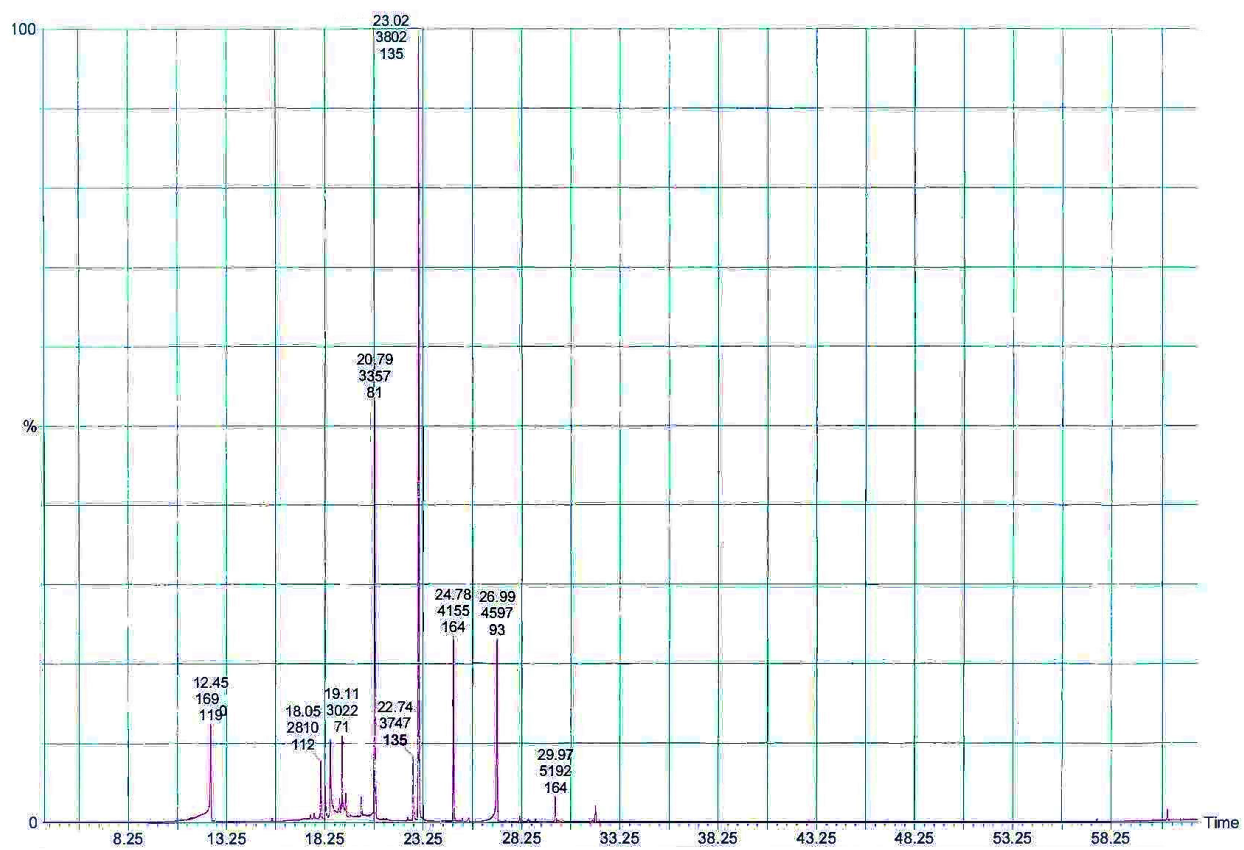

**Table S1.** Data analysis for the whole cell recordings.

|                            | <b>GluA1</b>   | <b>n</b> | <b>Plus thyme oil</b>  | <b>n</b> | <b>Plus Lavendar</b>    | <b>n</b> |
|----------------------------|----------------|----------|------------------------|----------|-------------------------|----------|
| Amplitude (pA)             | 724±101        | 16       | 710±74 <sup>ns</sup>   | 20       | 732±186 <sup>ns</sup>   | 20       |
| $\tau_{\omega}$ deact (ms) | 2.4±0.1        | 12       | 4.5±0.2 <sup>***</sup> | 12       | 7.2±0.9                 | 12       |
| $\tau_{\omega}$ des (ms)   | 3.2±0.1        | 16       | 5.6±0.7 <sup>***</sup> | 20       | 9.2±0.9                 | 20       |
|                            | <b>GluA1/2</b> | <b>n</b> | <b>Plus thyme oil</b>  | <b>n</b> | <b>Plus Lavendar</b>    | <b>n</b> |
| Amplitude (pA)             | 278±48         | 12       | 280±73 <sup>ns</sup>   | 12       | 207±40 <sup>ns</sup>    | 20       |
| $\tau_{\omega}$ deact (ms) | 2.3±0.1        | 12       | 4.8±0.5 <sup>***</sup> | 12       | 8.1±0.8 <sup>***</sup>  | 10       |
| $\tau_{\omega}$ des (ms)   | 5.6±0.6        | 12       | 5.3±0.5 <sup>ns</sup>  | 12       | 28.8±3.2 <sup>***</sup> | 20       |
|                            | <b>GluA2</b>   | <b>n</b> | <b>Plus thyme oil</b>  | <b>n</b> | <b>Plus Lavendar</b>    | <b>n</b> |
| Amplitude (pA)             | 935±67         | 15       | 920±56 <sup>ns</sup>   | 20       | 955±143 <sup>ns</sup>   | 20       |
| $\tau_{\omega}$ deact (ms) | 2.2±0.1        | 12       | 3.8±0.6 <sup>***</sup> | 12       | 5.6±0.3 <sup>***</sup>  | 12       |
| $\tau_{\omega}$ des (ms)   | 2.5±0.1        | 15       | 4.7±0.5 <sup>***</sup> | 20       | 8.4±0.9 <sup>***</sup>  | 20       |

Significance compared with AMPAR expressed alone (\*); p-value (one-way ANOVA): \* < 0.05, \*\* < 0.01, \*\*\* < 0.001, ns – not significant.
